# Supplementary material
Source: MDPI journal article supplement (https://www.mdpi.com/2673-1991/3/3/38)
Supplement: s1 [file s1]

## File S1

((thermography).ti,ab OR (thermal imaging).ti,ab OR (thermograph\*).ti,ab OR (thermal imag\*).ti,ab OR (infrared imag\*).ti,ab OR (forward-looking infrared).ti,ab OR (flir).ti,ab OR (dynamic infrared thermography).ti,ab OR (dirt).ti,ab OR (irt).ti,ab OR (infrared imaging).ti,ab) AND ((burns).ti,ab OR (burn\*).ti,ab OR (burn depth).ti,ab)
